# Supplementary material
Source: Research Square preprint supplement (doi:10.21203/rs.3.rs-9498033/v1)
Supplement: Supplementary file 2 [file 57ca079a7462686ad59f70d2.docx]

**Table 2.** Inhibition of the P. lividus larval growth caused by the leachate obtained from marine litter items of different geographical origins classified according to OSPAR. Results (CE10, CE50, and UT) with 95% confidence intervals.

| Item class |  |  |  |  |  |  |
| --- | --- | --- | --- | --- | --- | --- |
| Cig Butts & Filt | **Baltic Sea** 136E | **Morocco** 157D | **Galicia** 153C | **Tunisia** 161D | **Egypt** 160D |  |
| EC10(mg/L)  EC50(mg/L)  TU | 278  1,031  9.7 (8.07-11-70) | 372  1,497  6.7 (5.74-7.80) | 400  1,567  6.4 (4.90-8.40) | 619  1,667  6.0 (5.21-6.94 | 441  1,859  5.4 (4.50-6.43) |  |
| Foam | **Baltic Sea** 136D | **Egypt** 160C | **NE Atlantic** REP-05 | **Galicia** 153B | **Tunisia** 161C | **Morocco** 157C |
| EC10(mg/L)  EC50(mg/L)  TU | 501  3,448  2.9 (2.22-3.66) | 1,600  7,847  1.3 (0.88-1.64) | 2,778  9901  1.01 (0.76-1.43) | 535  >10,000  <1 | 3,125  >10,000  <1 | 3,413  >10,000  <1 |
| Aquaculture - Fisheries | **NE Atlantic** REP-02 | **Italy** ID091-RSP | **NE Atlantic** REP-03 | **NE Atlantic** REP-04 | **Galicia** 082 |  |
| EC10(mg/L)  EC50(mg/L)  TU | 1,431  3546  2.82 (1.03-4.78) | 3,579  >10,000  <1 | 5,263  >10,000  <1 | 7,257  >10,000  <1 | 8,344  >10,000  <1 |  |
| Strings & Cords | **Galicia** 153E | **Morocco** 157B | **Tunisia** 161B | **Baltic Sea** 136A | **Egypt** 160B |  |
| EC10(mg/L)  EC50(mg/L)  TU | 1,613  6,803  1,50 | 2,020  >10,000  <1 | 2,674  >10,000  <1 | 2,801  >10,000  <1 | >10,000  >10,000  <1 |  |
| Plastic Caps | **Egypt** 160A | **Galicia** 153A | **Baltic Sea** 136C | **Morocco** 157A | **Tunisia** 161A |  |
| EC10(mg/L)  EC50(mg/L)  TU | 2,890  9,009  1.1 (1.00-1.22) | 2,273  >10,000  <1 | 3,436  >10,000  <1 | 6,711  >10,000  <1 | >10,000  >10,000  <1 |  |
| Metal Caps, Lids, Pull Tabs | **Galicia** 153D | **Baltic Sea** 136G |  |  |  |  |
| EC10(mg/L)  EC50(mg/L)  TU | 2,049  >10,000  <1 | 3,268  >10,000  <1 |  |  |  |  |
| Plastic bottles | **NE Atlantic** REP-01 | **Italy** ID094-RSP |  |  |  |  |
| EC10(mg/L)  EC50(mg/L)  TU | 5,555  >10,000  <1 | >10,000  >10,000  <1 |  |  |  |  |
