# Supplementary material
Source: Research Square preprint supplement (doi:10.21203/rs.3.rs-9498033/v1)
Supplement: Supplementary file 3 [file 859ba2b29b72b57ea65e64b4.docx]

**Table 1**. Toxicity classification based on the sea-urchin embryo test effective concentrations (EC10 and EC50) and Toxic Units (TU)

| EC10 (mgL) | EC50 (mgL) | TU | Toxicity |
| --- | --- | --- | --- |
| >10,000 | **-** | - | None |
| ≤10,000 | **>10,000** | <1 | Negligible |
| - | **2000<**EC50≤**10,000** | 1 ≤ TU<5 | Low |
| - | **400<**EC50≤**2000** | 5 ≤ TU<25 | Medium |
| - | **≤400** | ≥25 | High |
