# Supplementary material
Source: Research Square preprint supplement (doi:10.21203/rs.3.rs-9498033/v1)
Supplement: Supplementary file 4 [file 99cf0ae6e0554107d18017fe.docx]

**Supplementary material**

**Table 1: Marine litter items tested with reference codes from OSPAR, TSG-ML, geographical origin and sample ID**

|  |  |  |  | sample ID | | | | | | |
| --- | --- | --- | --- | --- | --- | --- | --- | --- | --- | --- |
| Item class | **Material** | **OSPAR** | **TSG-ML** | **Baltic Sea** | **Morocco** | **Egypt** | **Tunisia** | **Galicia** | **Italy** | **NE Atlantic** |
| Strings & Cords | Plastic | 32 | G50 | 136A | 157B | 160B | 161B | 153E |  |  |
| Plastic Caps | Plastic | 15 | G21–G23 | 136C | 157A | 160A | 161A | 153A |  |  |
| Foam (Packaging, Insulation, Polyurethane) | Plastic | 45 | G73–G74 | 136D | 157C | 160C | 161C | 153B |  | REP-05 |
| Cigarette Butts and Filters | Plastic | 64 | G27 | 136E | 157D | 160D | 161D | 153C |  |  |
| Bottle Caps, Lids, Pull Tabs | Metal | 77 | G178 | 136G |  |  |  | 153D |  |  |
| Plastic bottles | Plastic | 4 | G6 |  |  |  |  |  | ID094-RSP | REP-01 |
| Aquaculture - Fisheries | Plastic | 28 | G45 |  |  |  |  |  | ID091-RSP | REP-02,  REP-03,  REP-04 |

**Figure A: Photos of tested items**

**Photos for items: REP-05 (piece of insulating cork) & REP-04 (buoy) are missing.*

Strings & Cords

136A

157B

160B

161B

153E


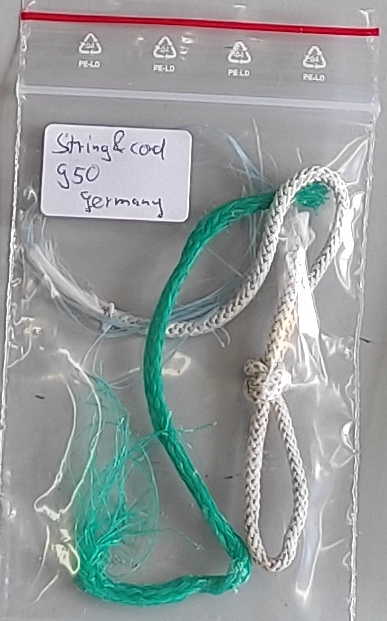

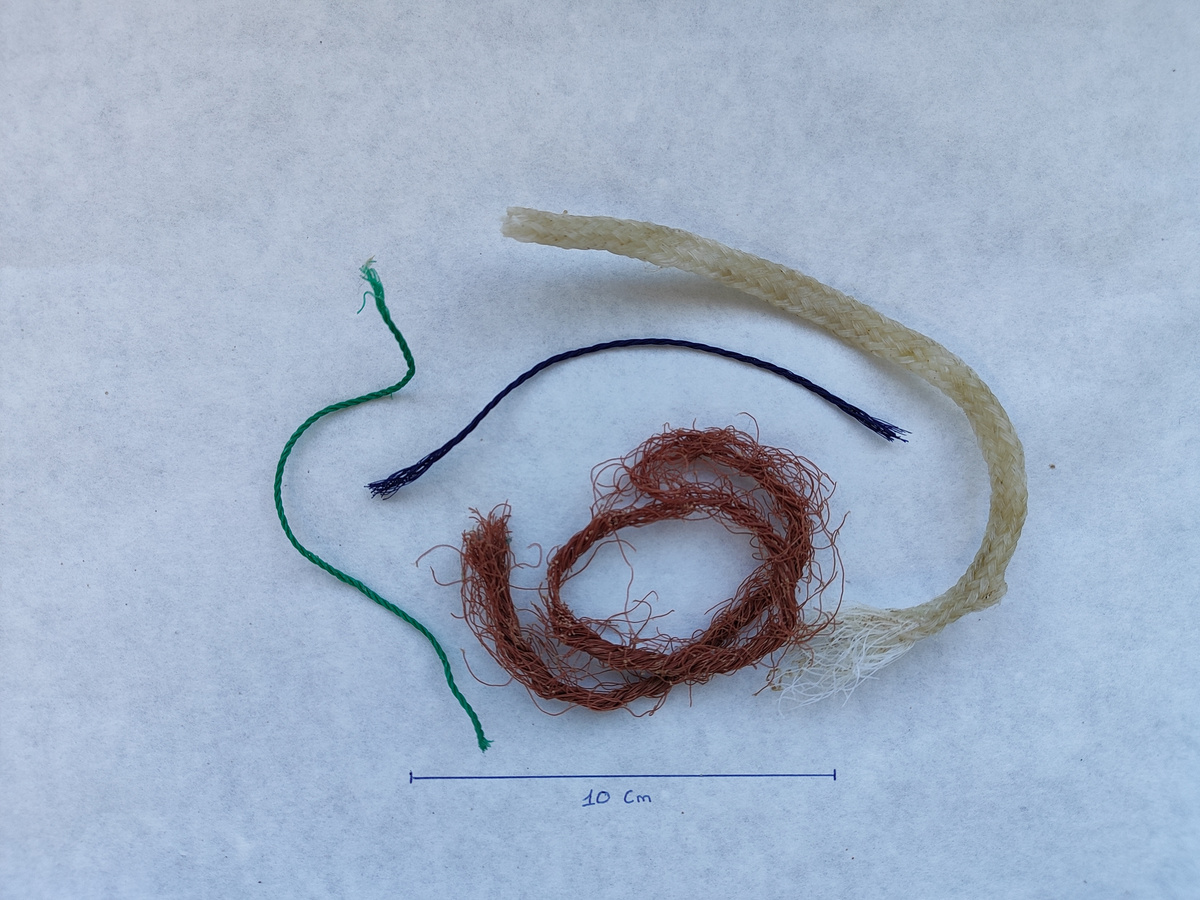

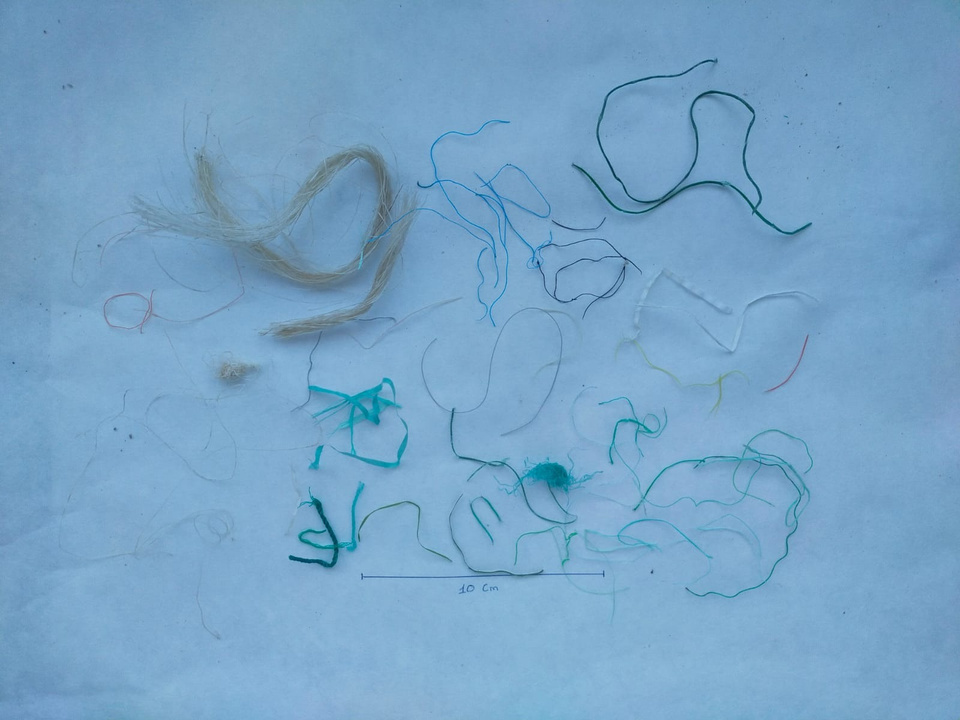

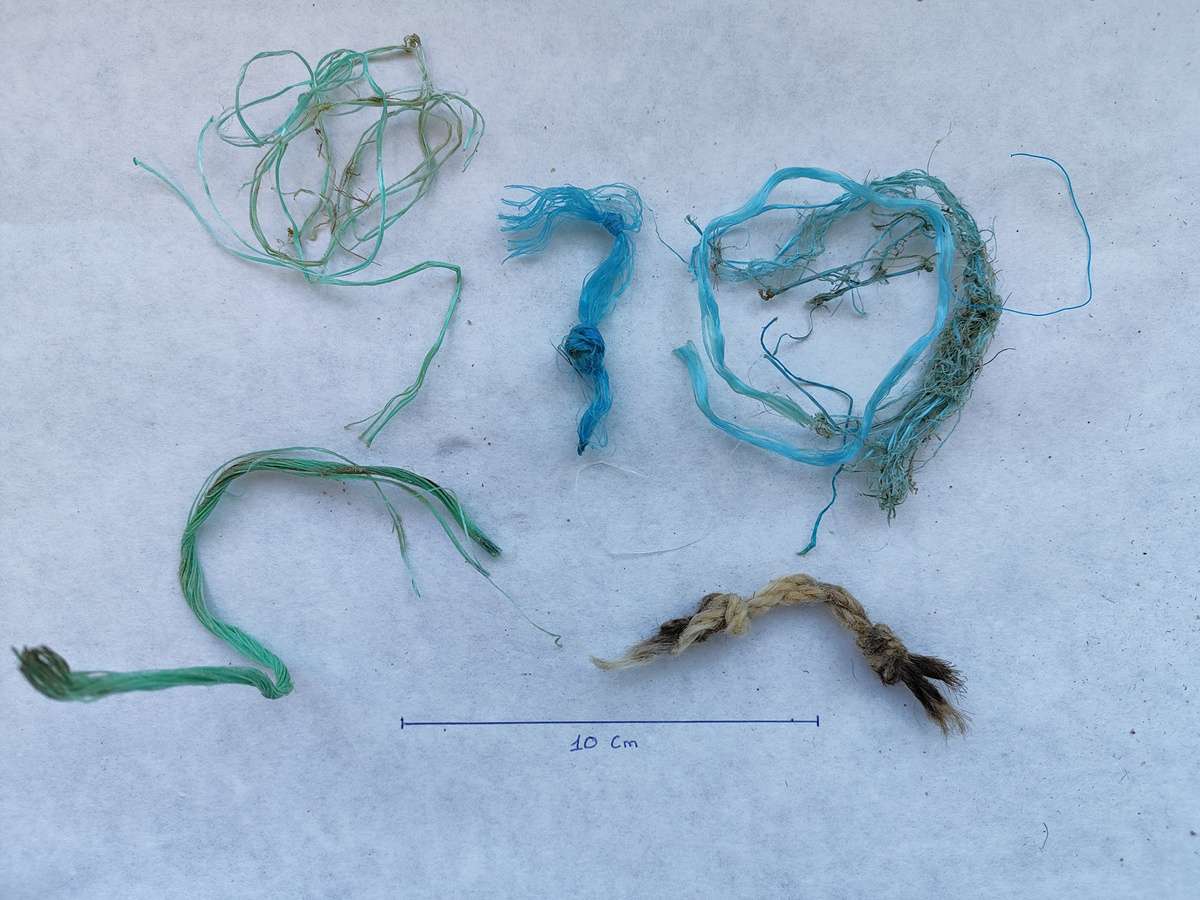

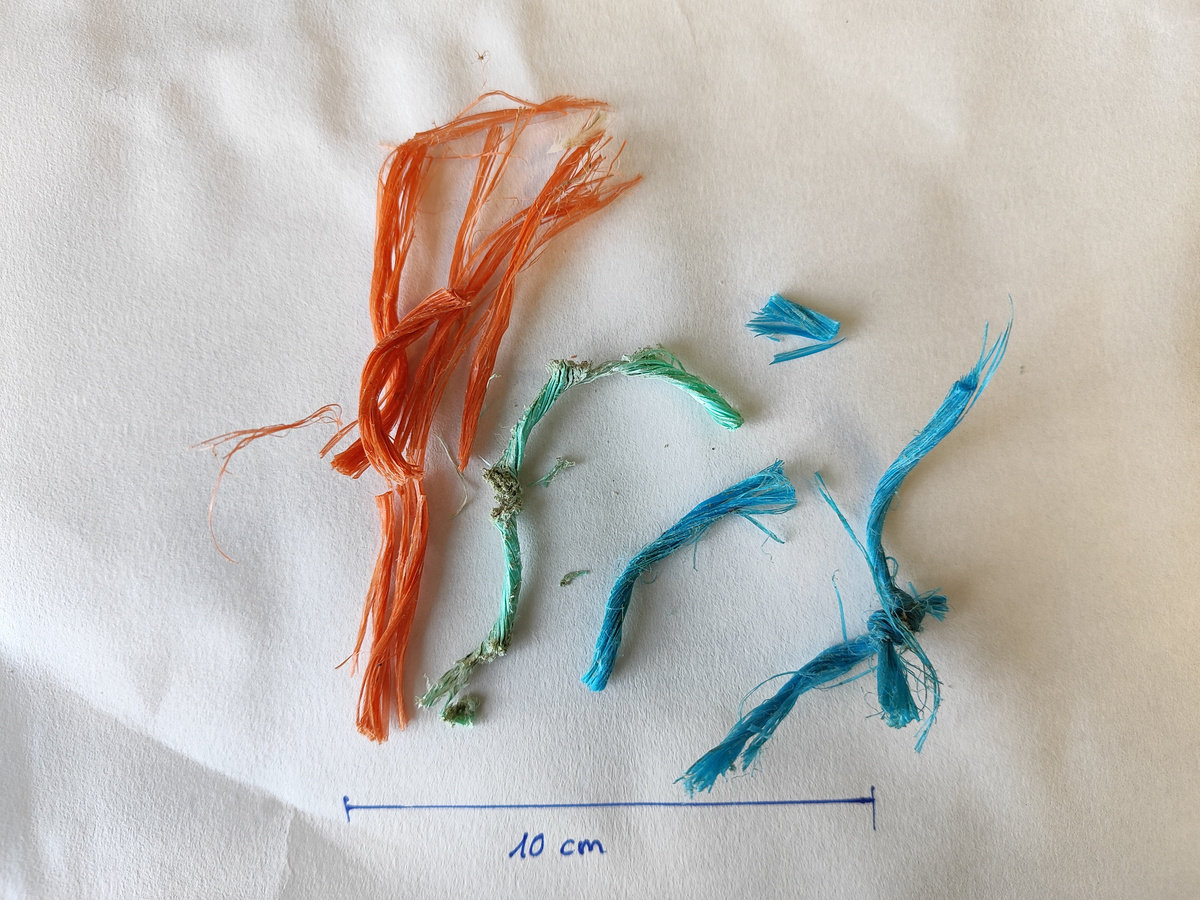


Plastic Caps

157A

160A

136C


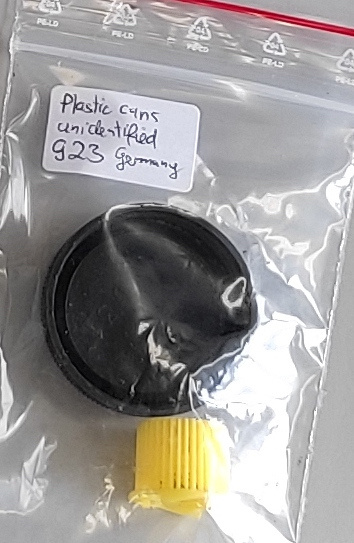

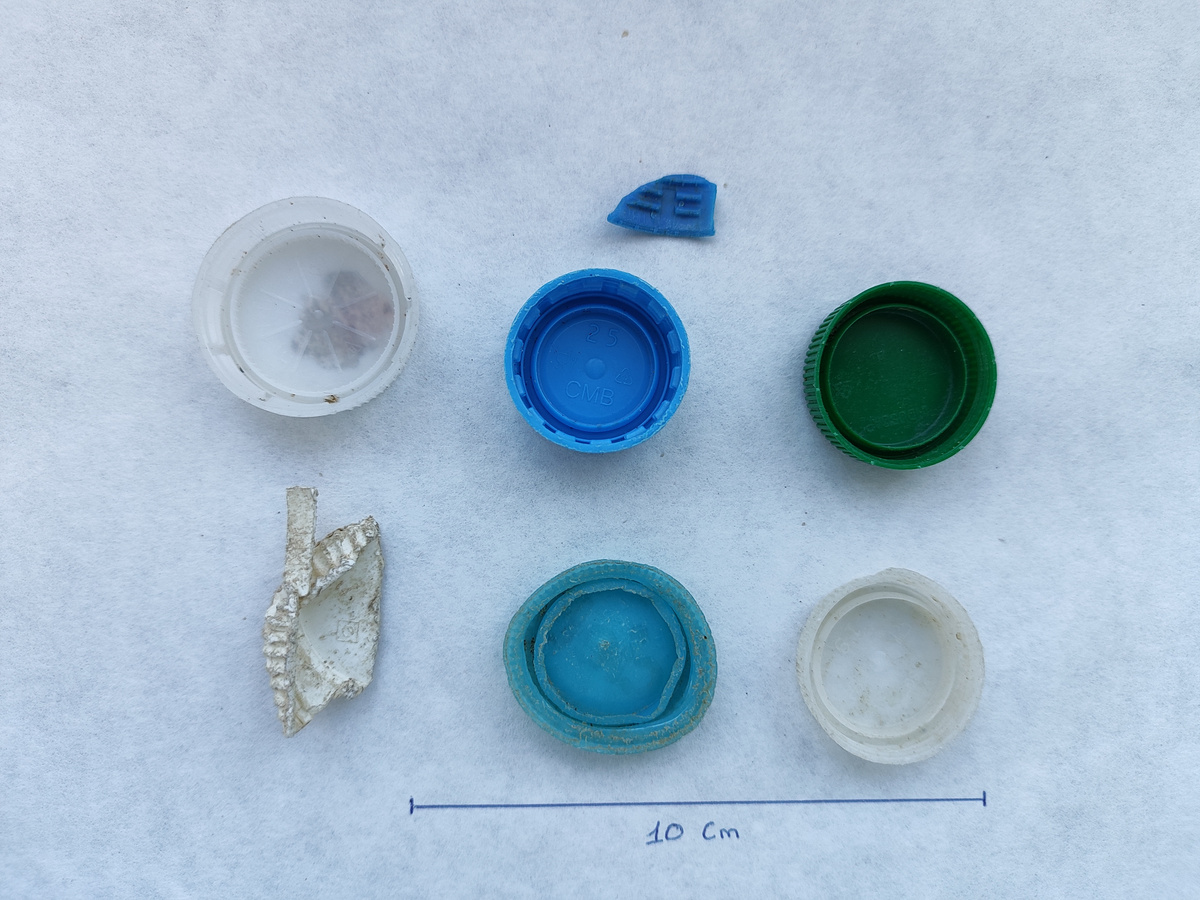

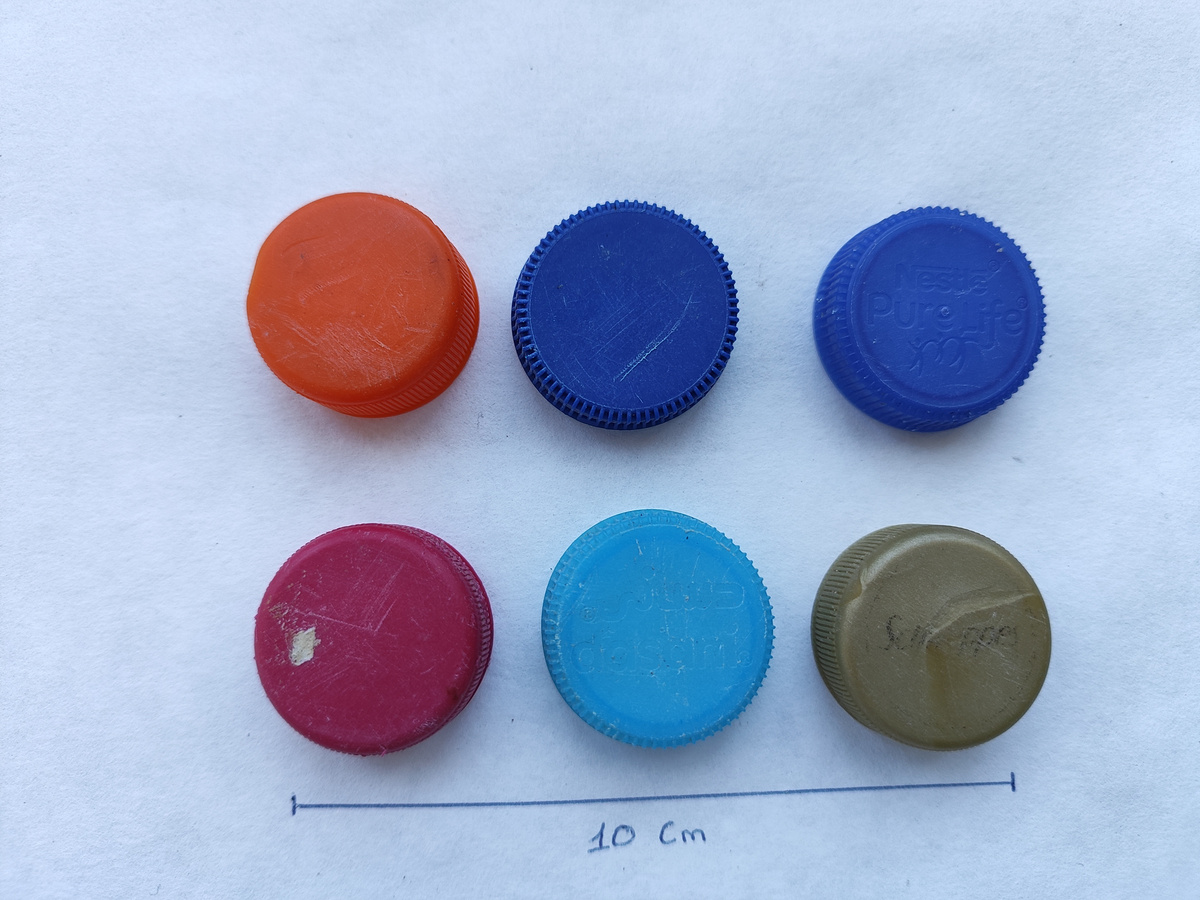

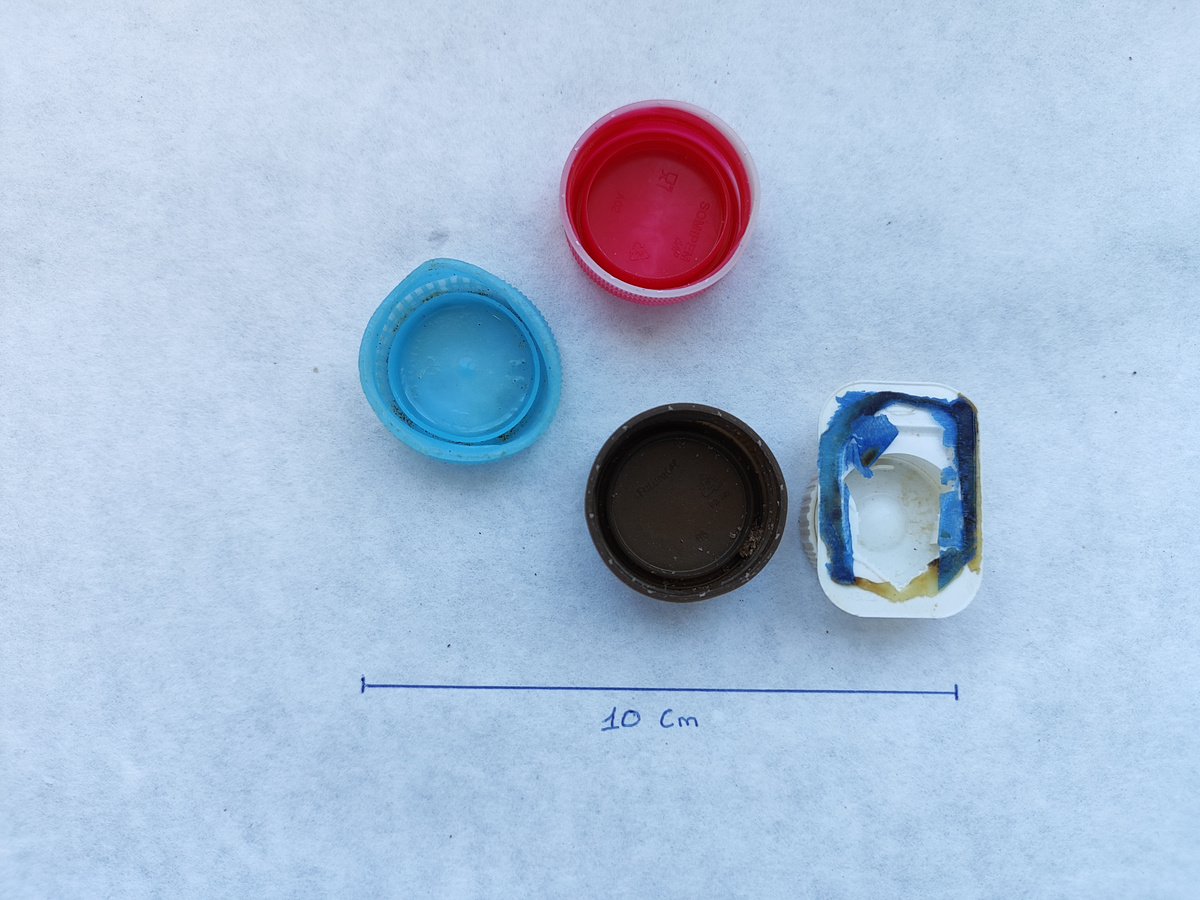

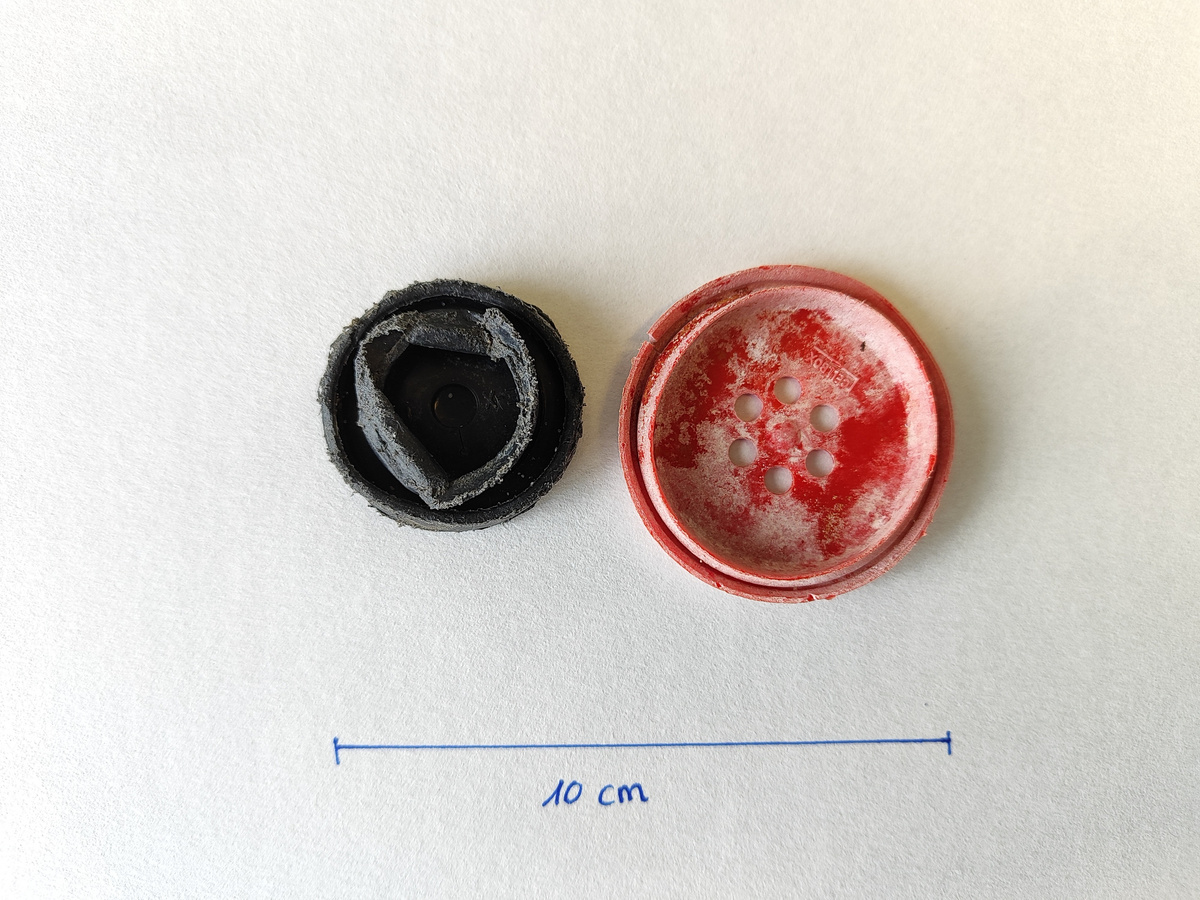


153A

161A

Foam (Packaging, Insulation, Polyurethane)


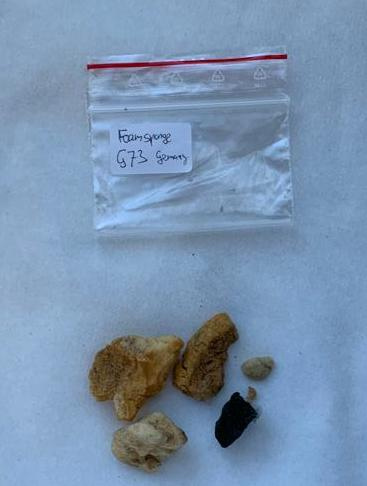

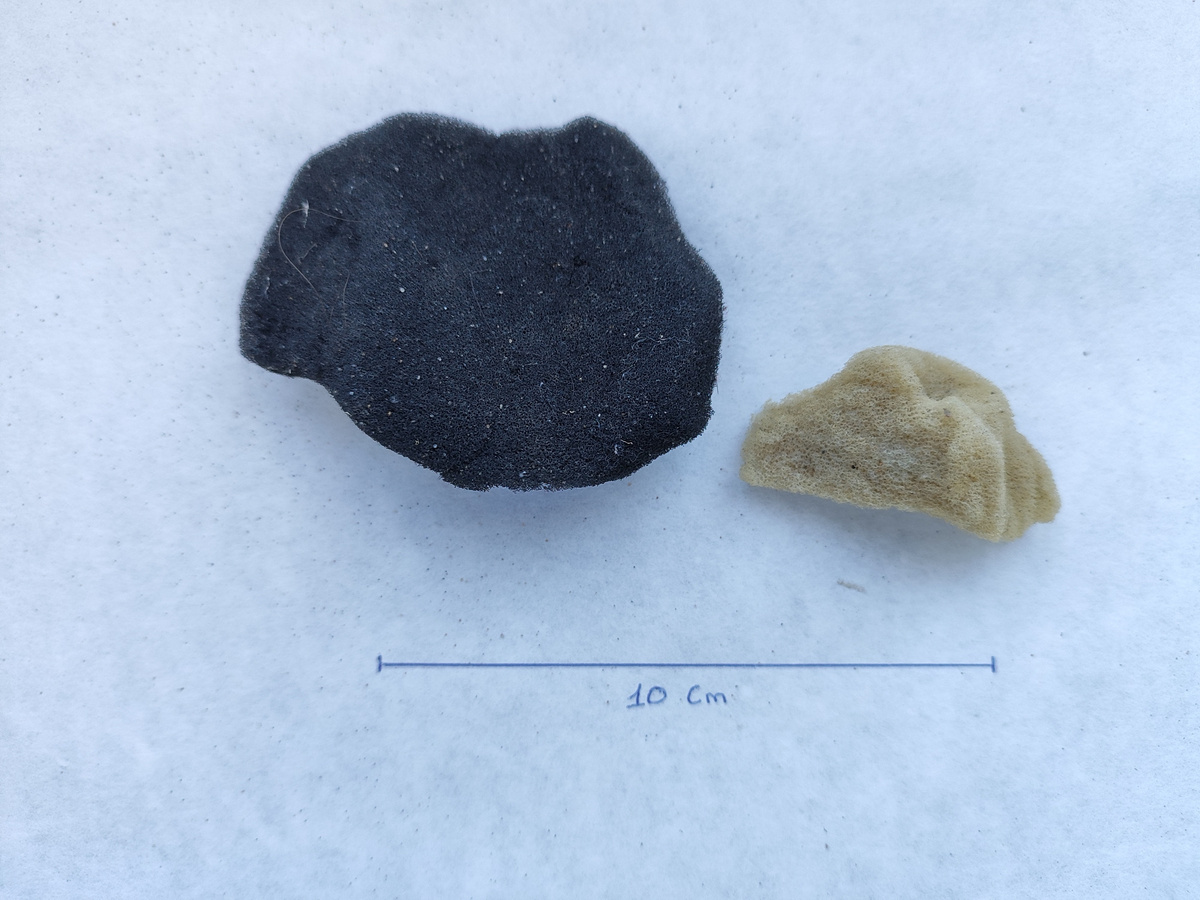

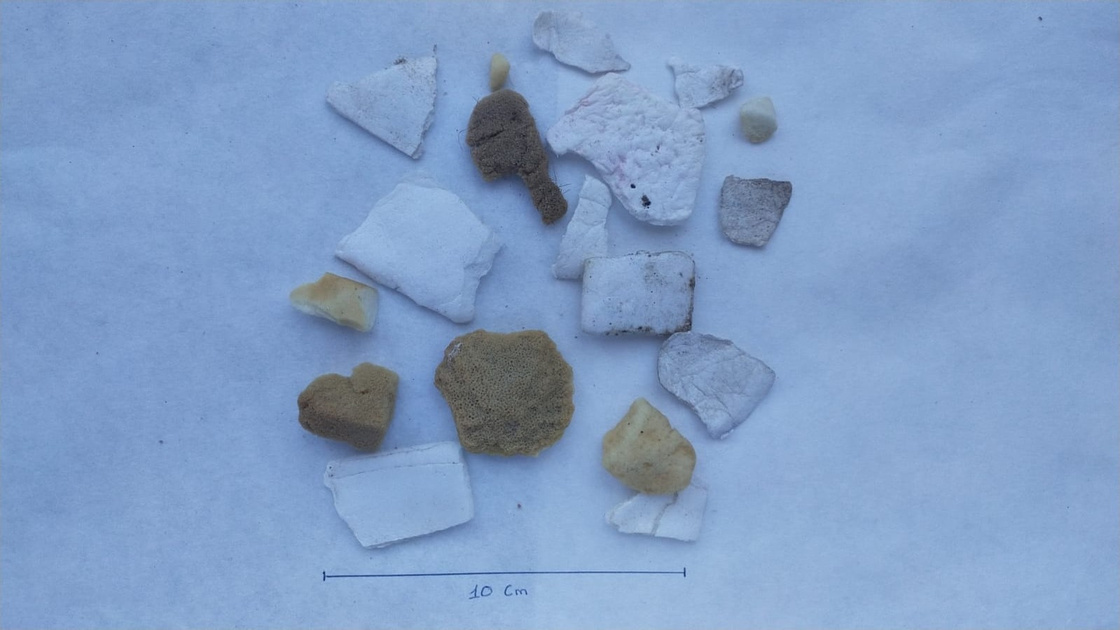

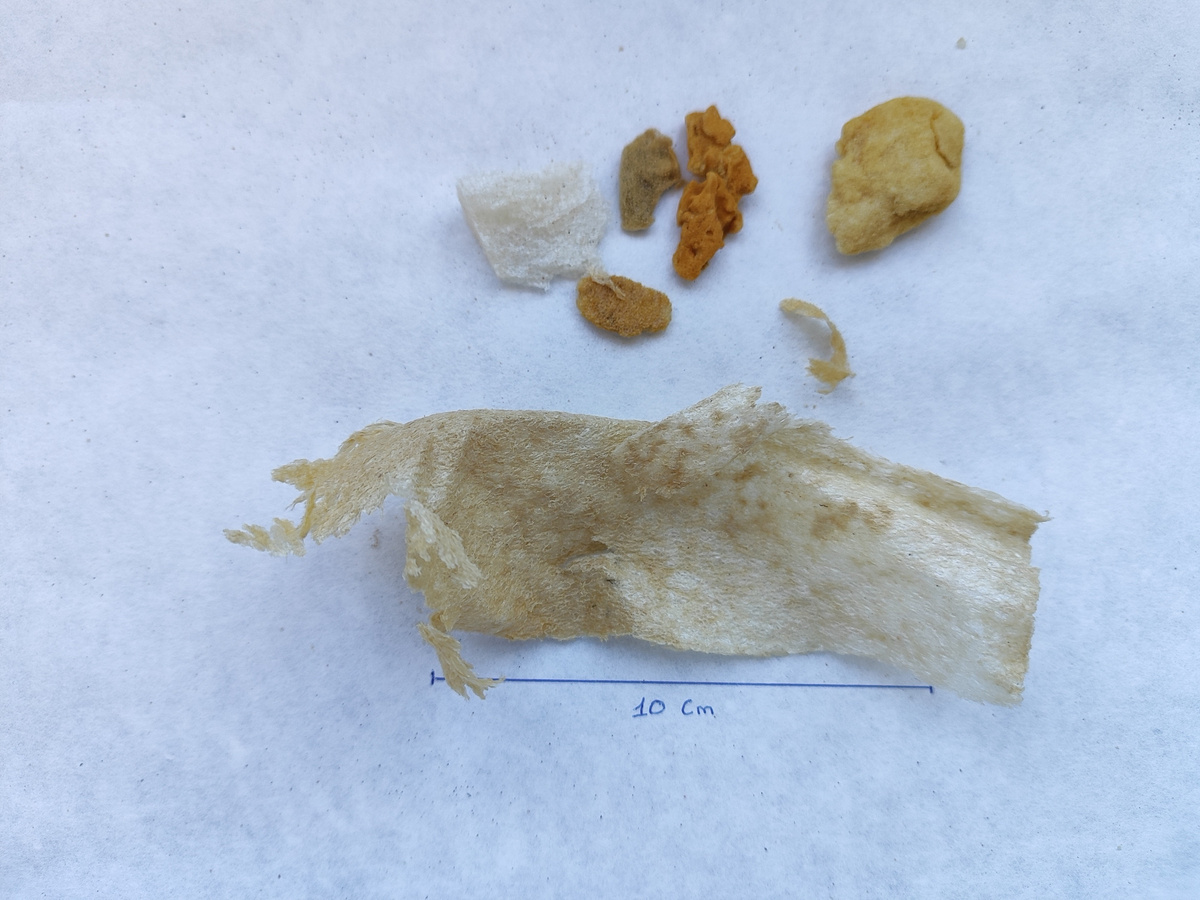

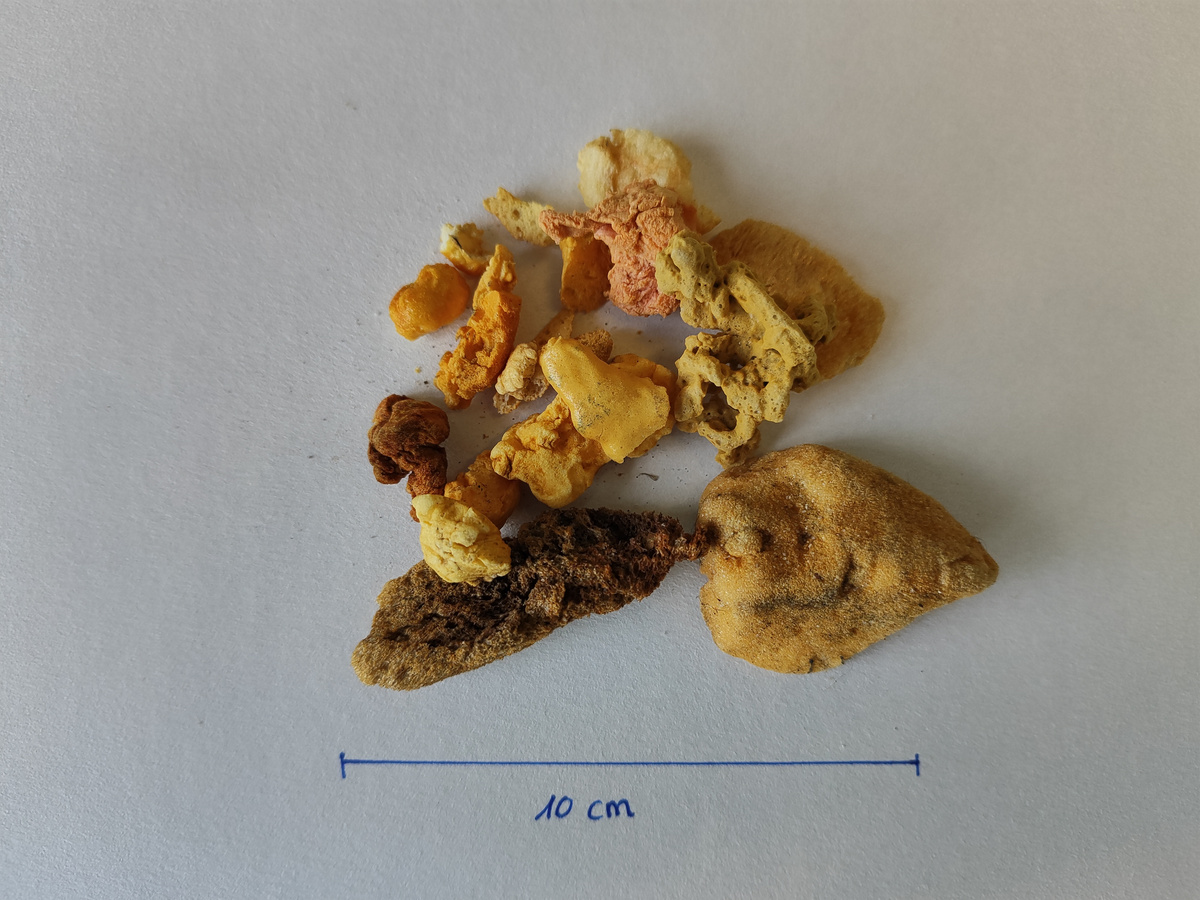


153B

161C

160C

157C

136D

Cigarette Butts and Filters


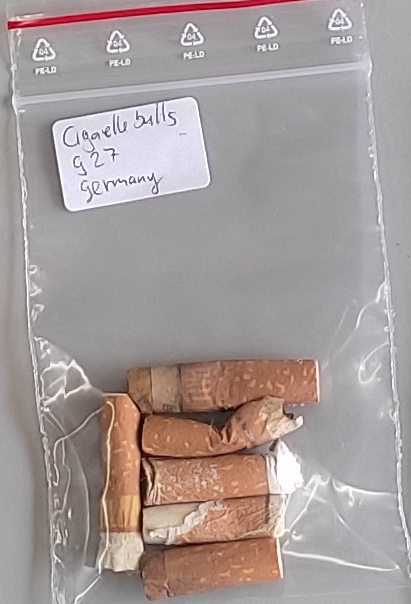

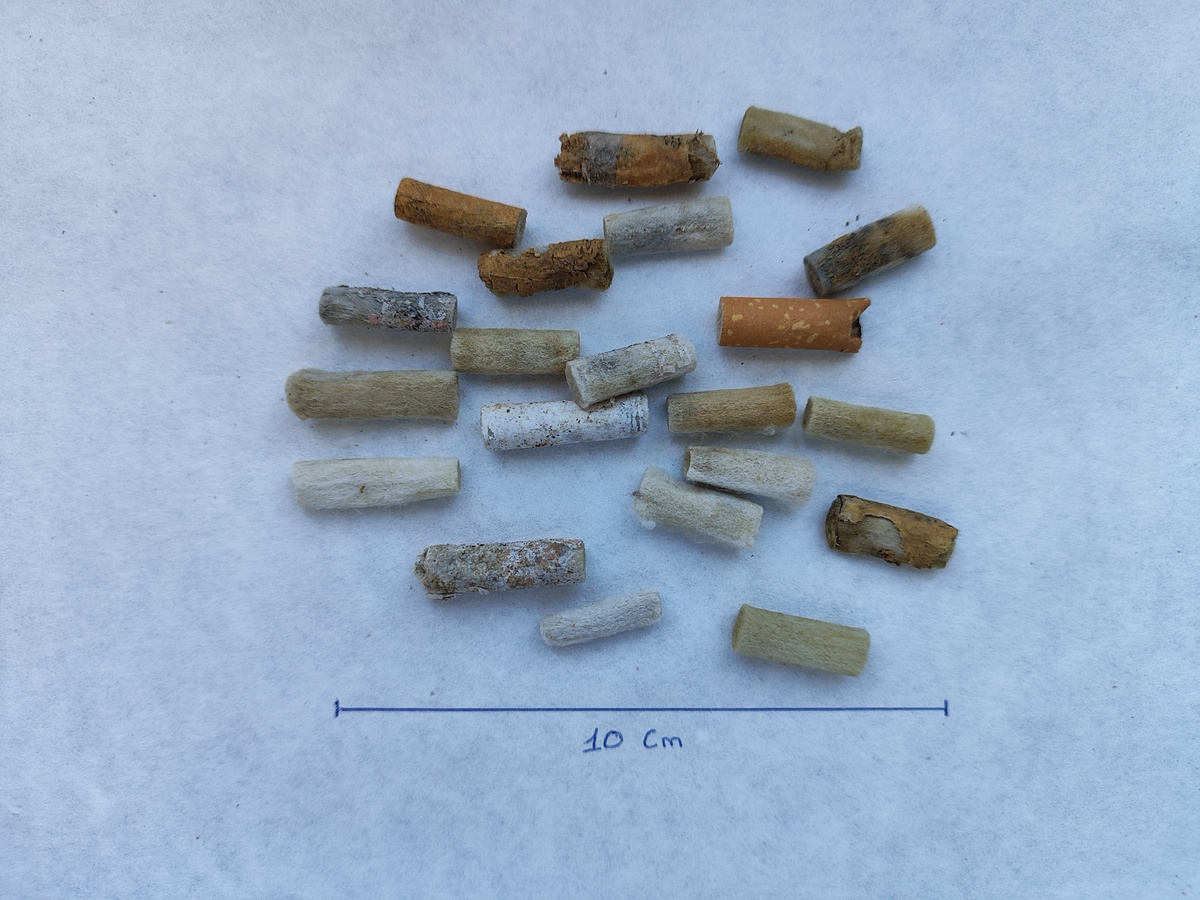

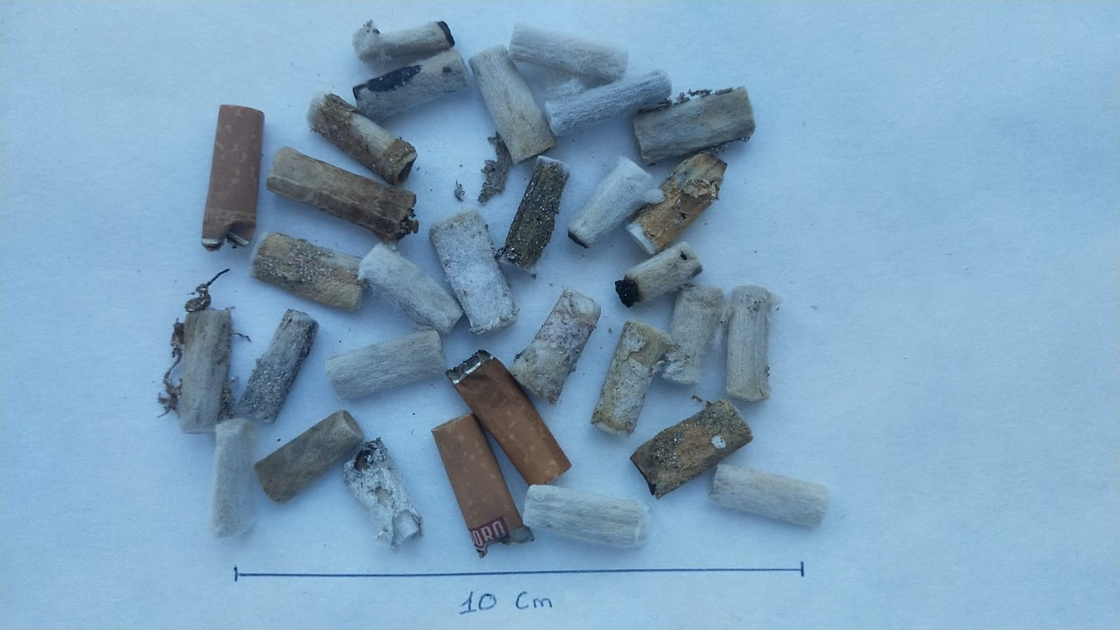

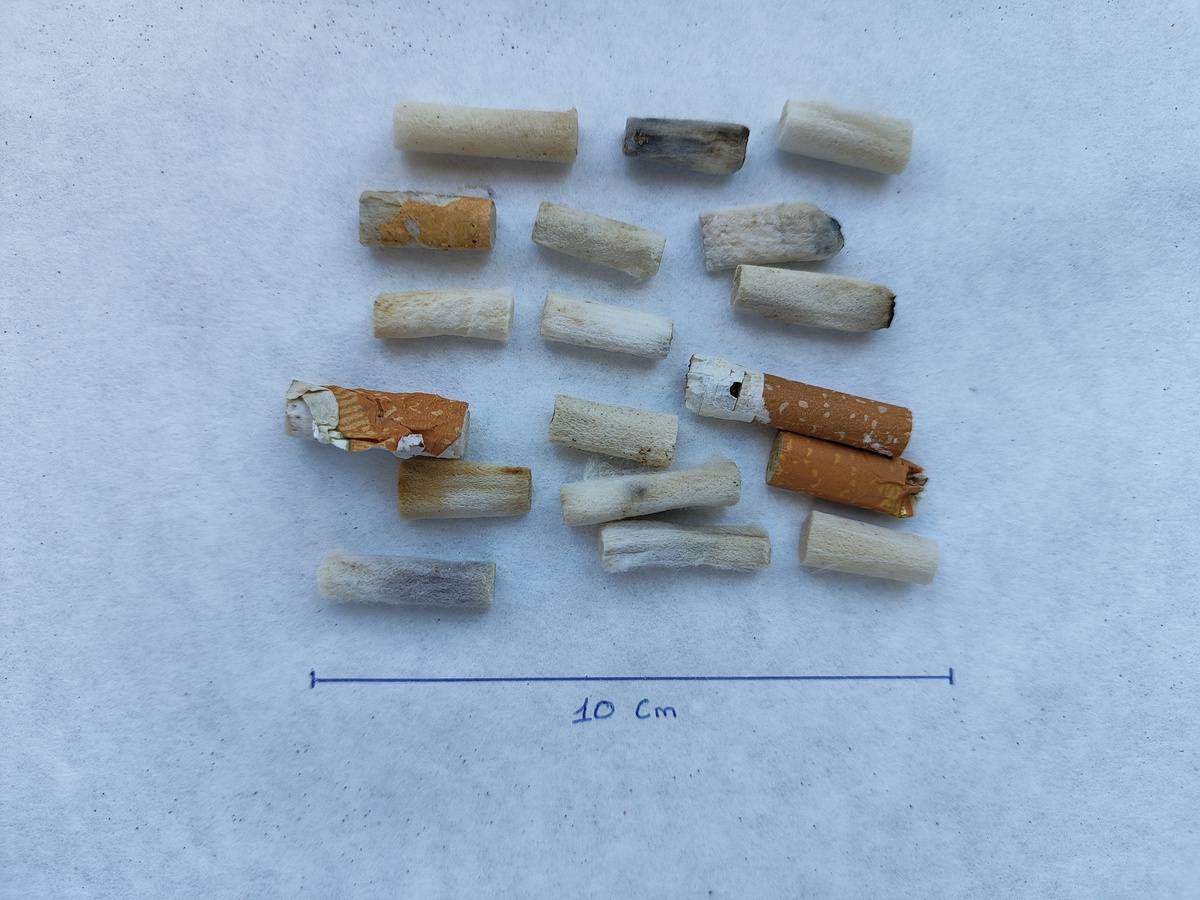

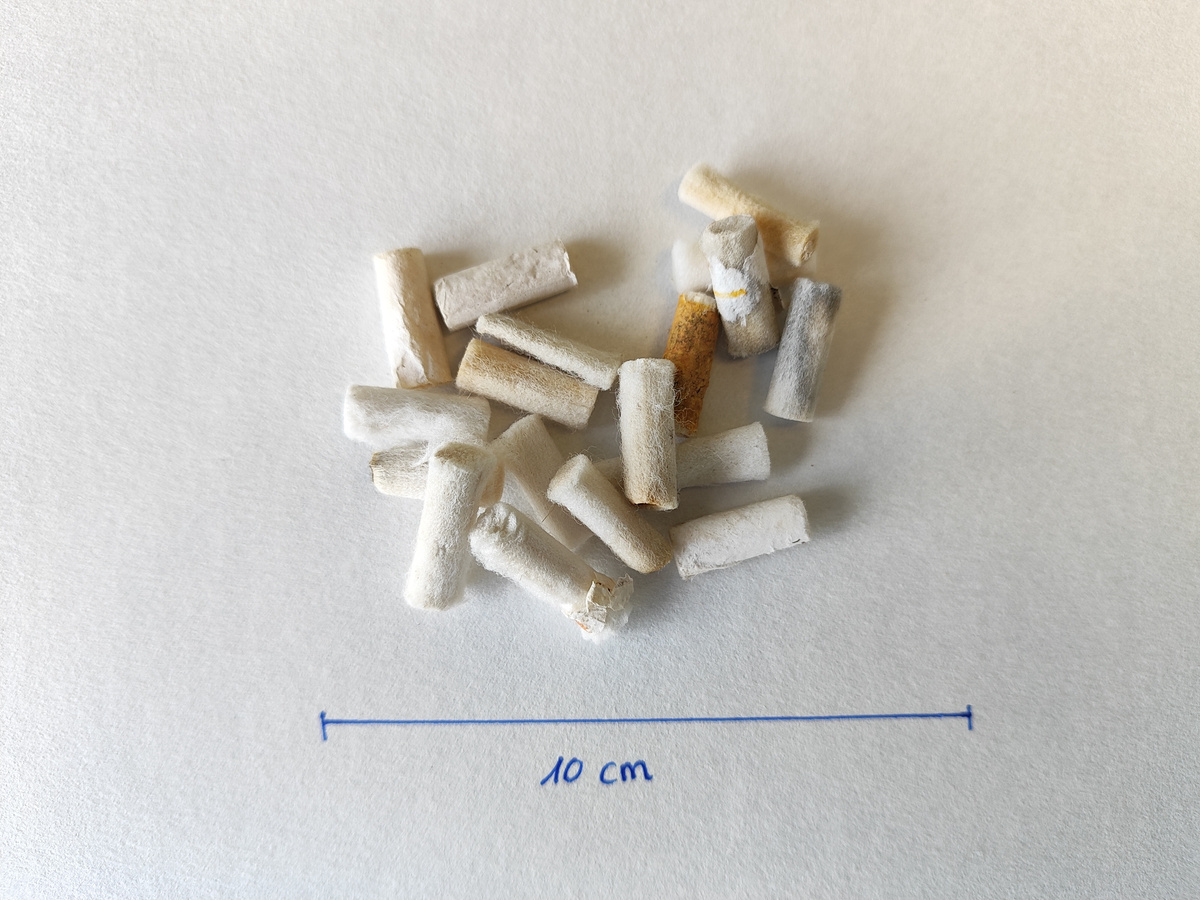


153C

161D

160D

157D

136E

Bottle Caps, Lids, Pull Tabs. Plastic bottles

ID094-RSP


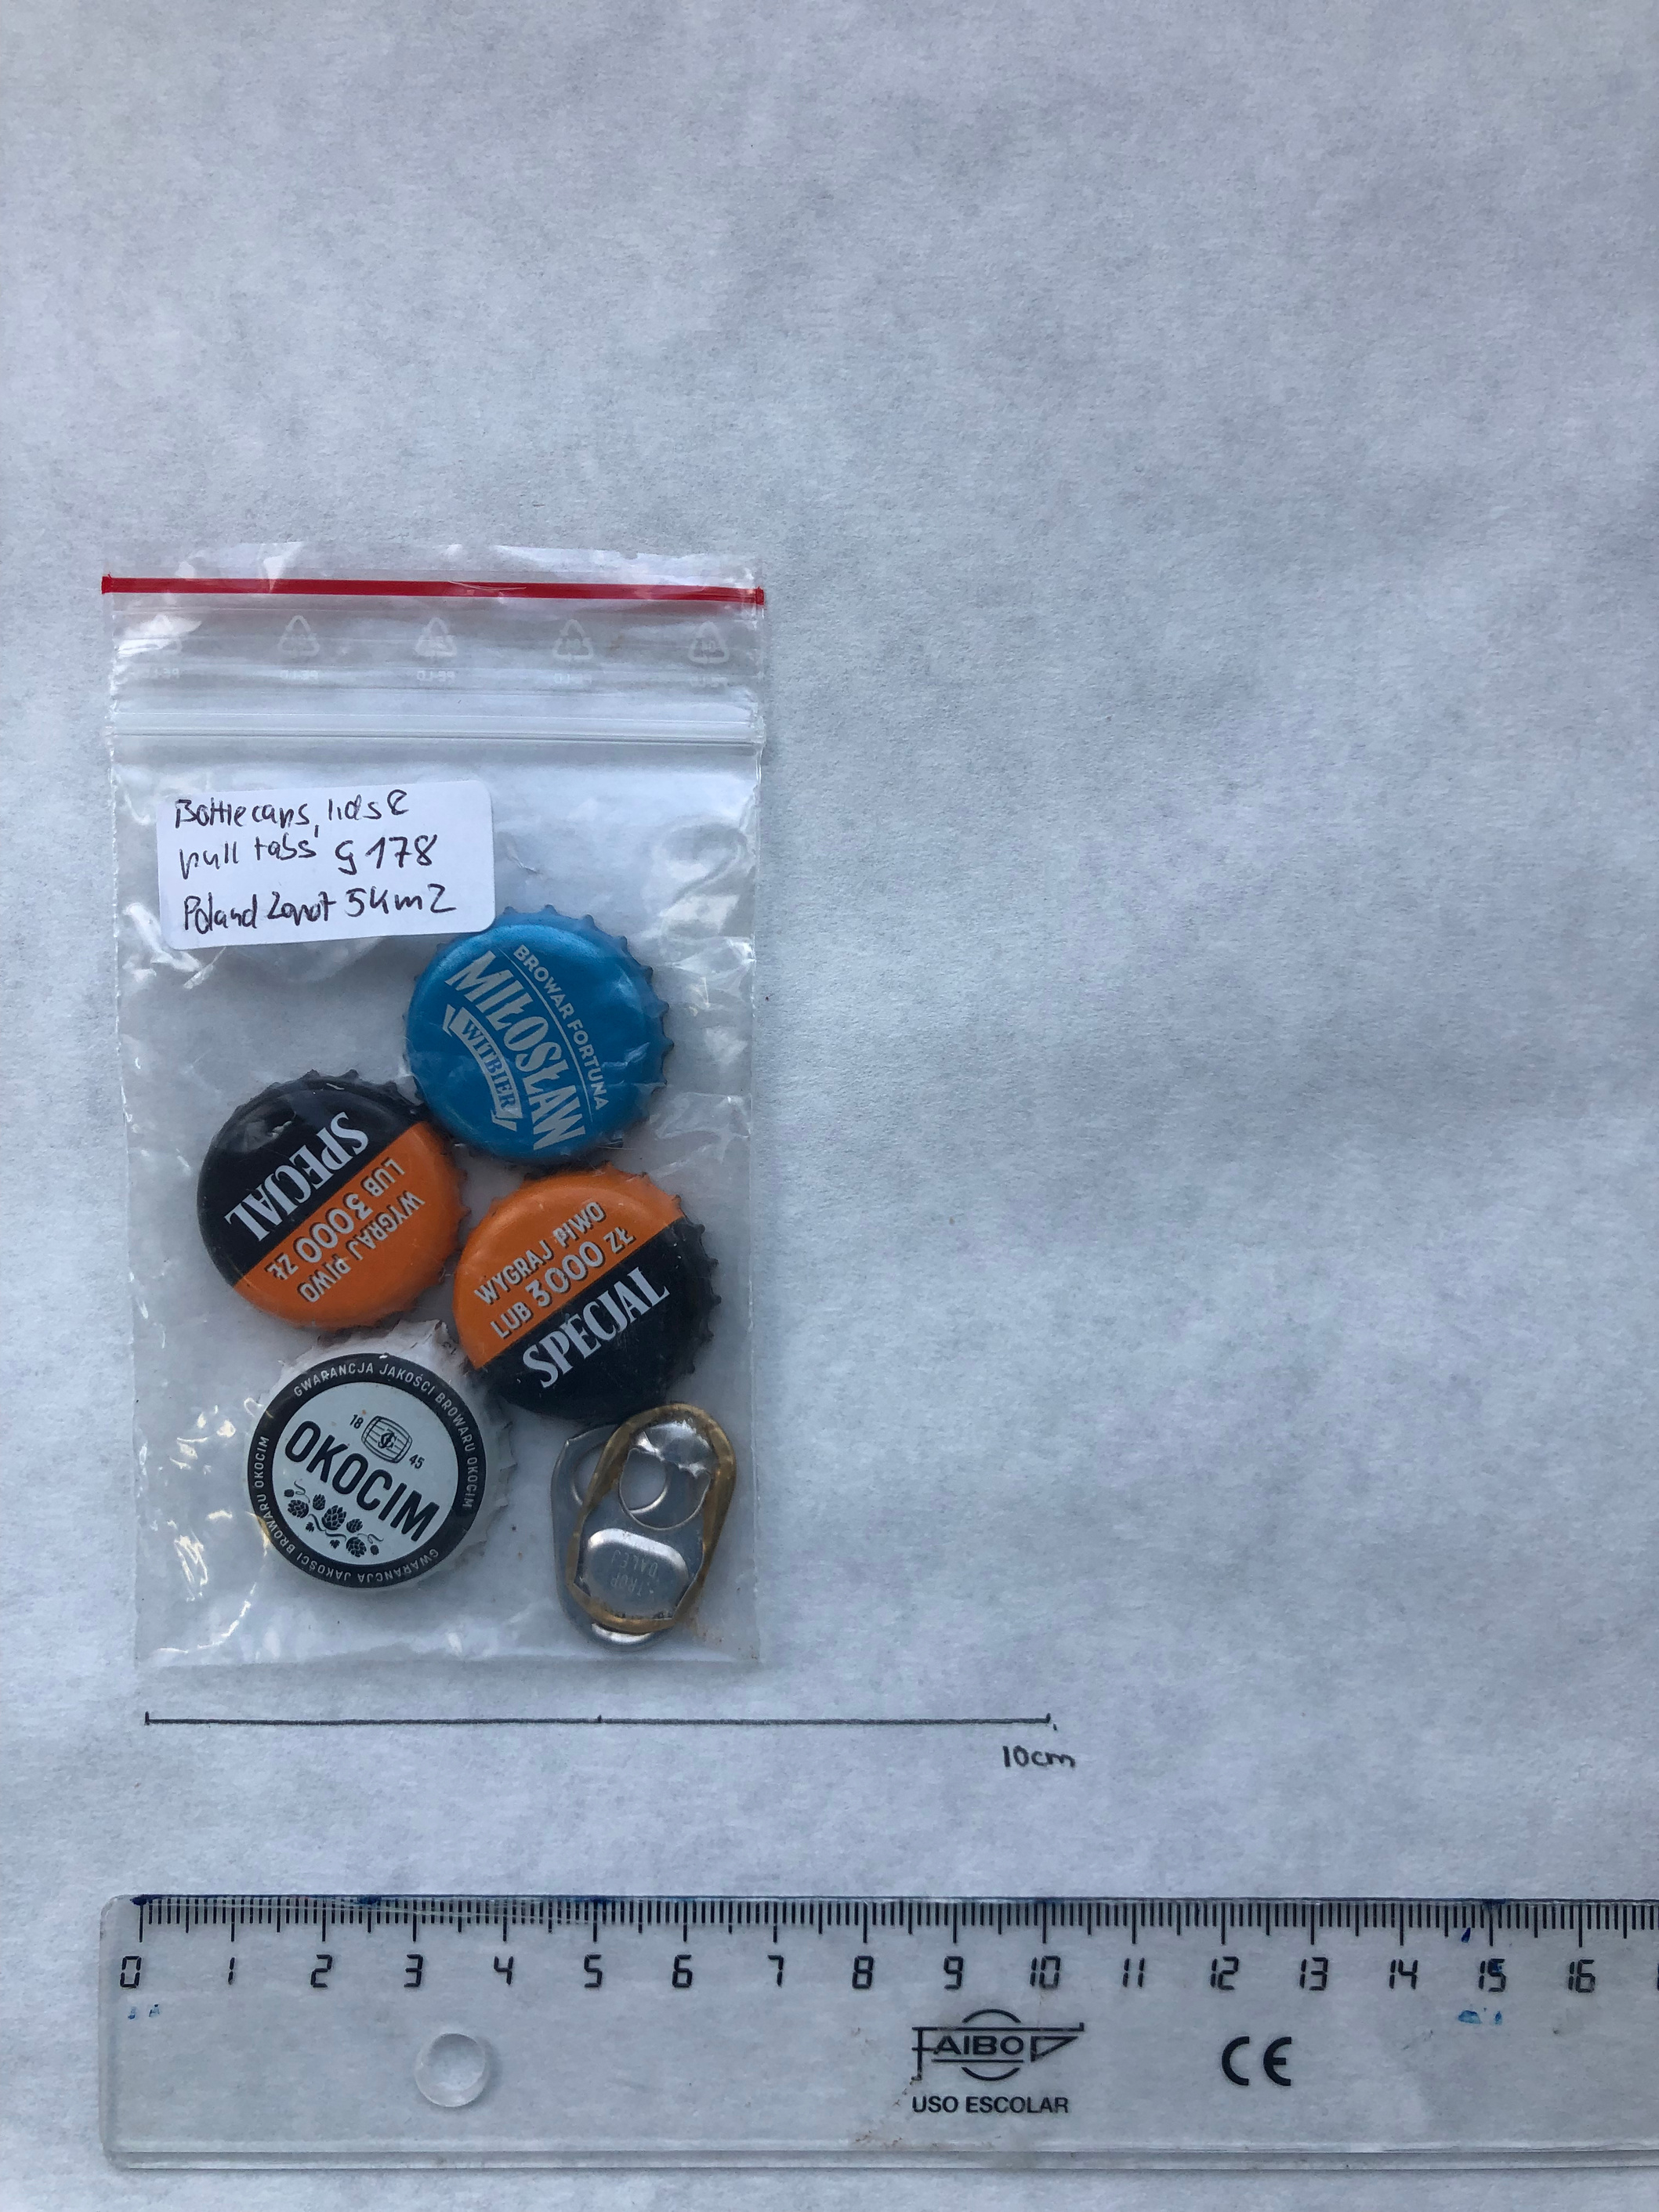

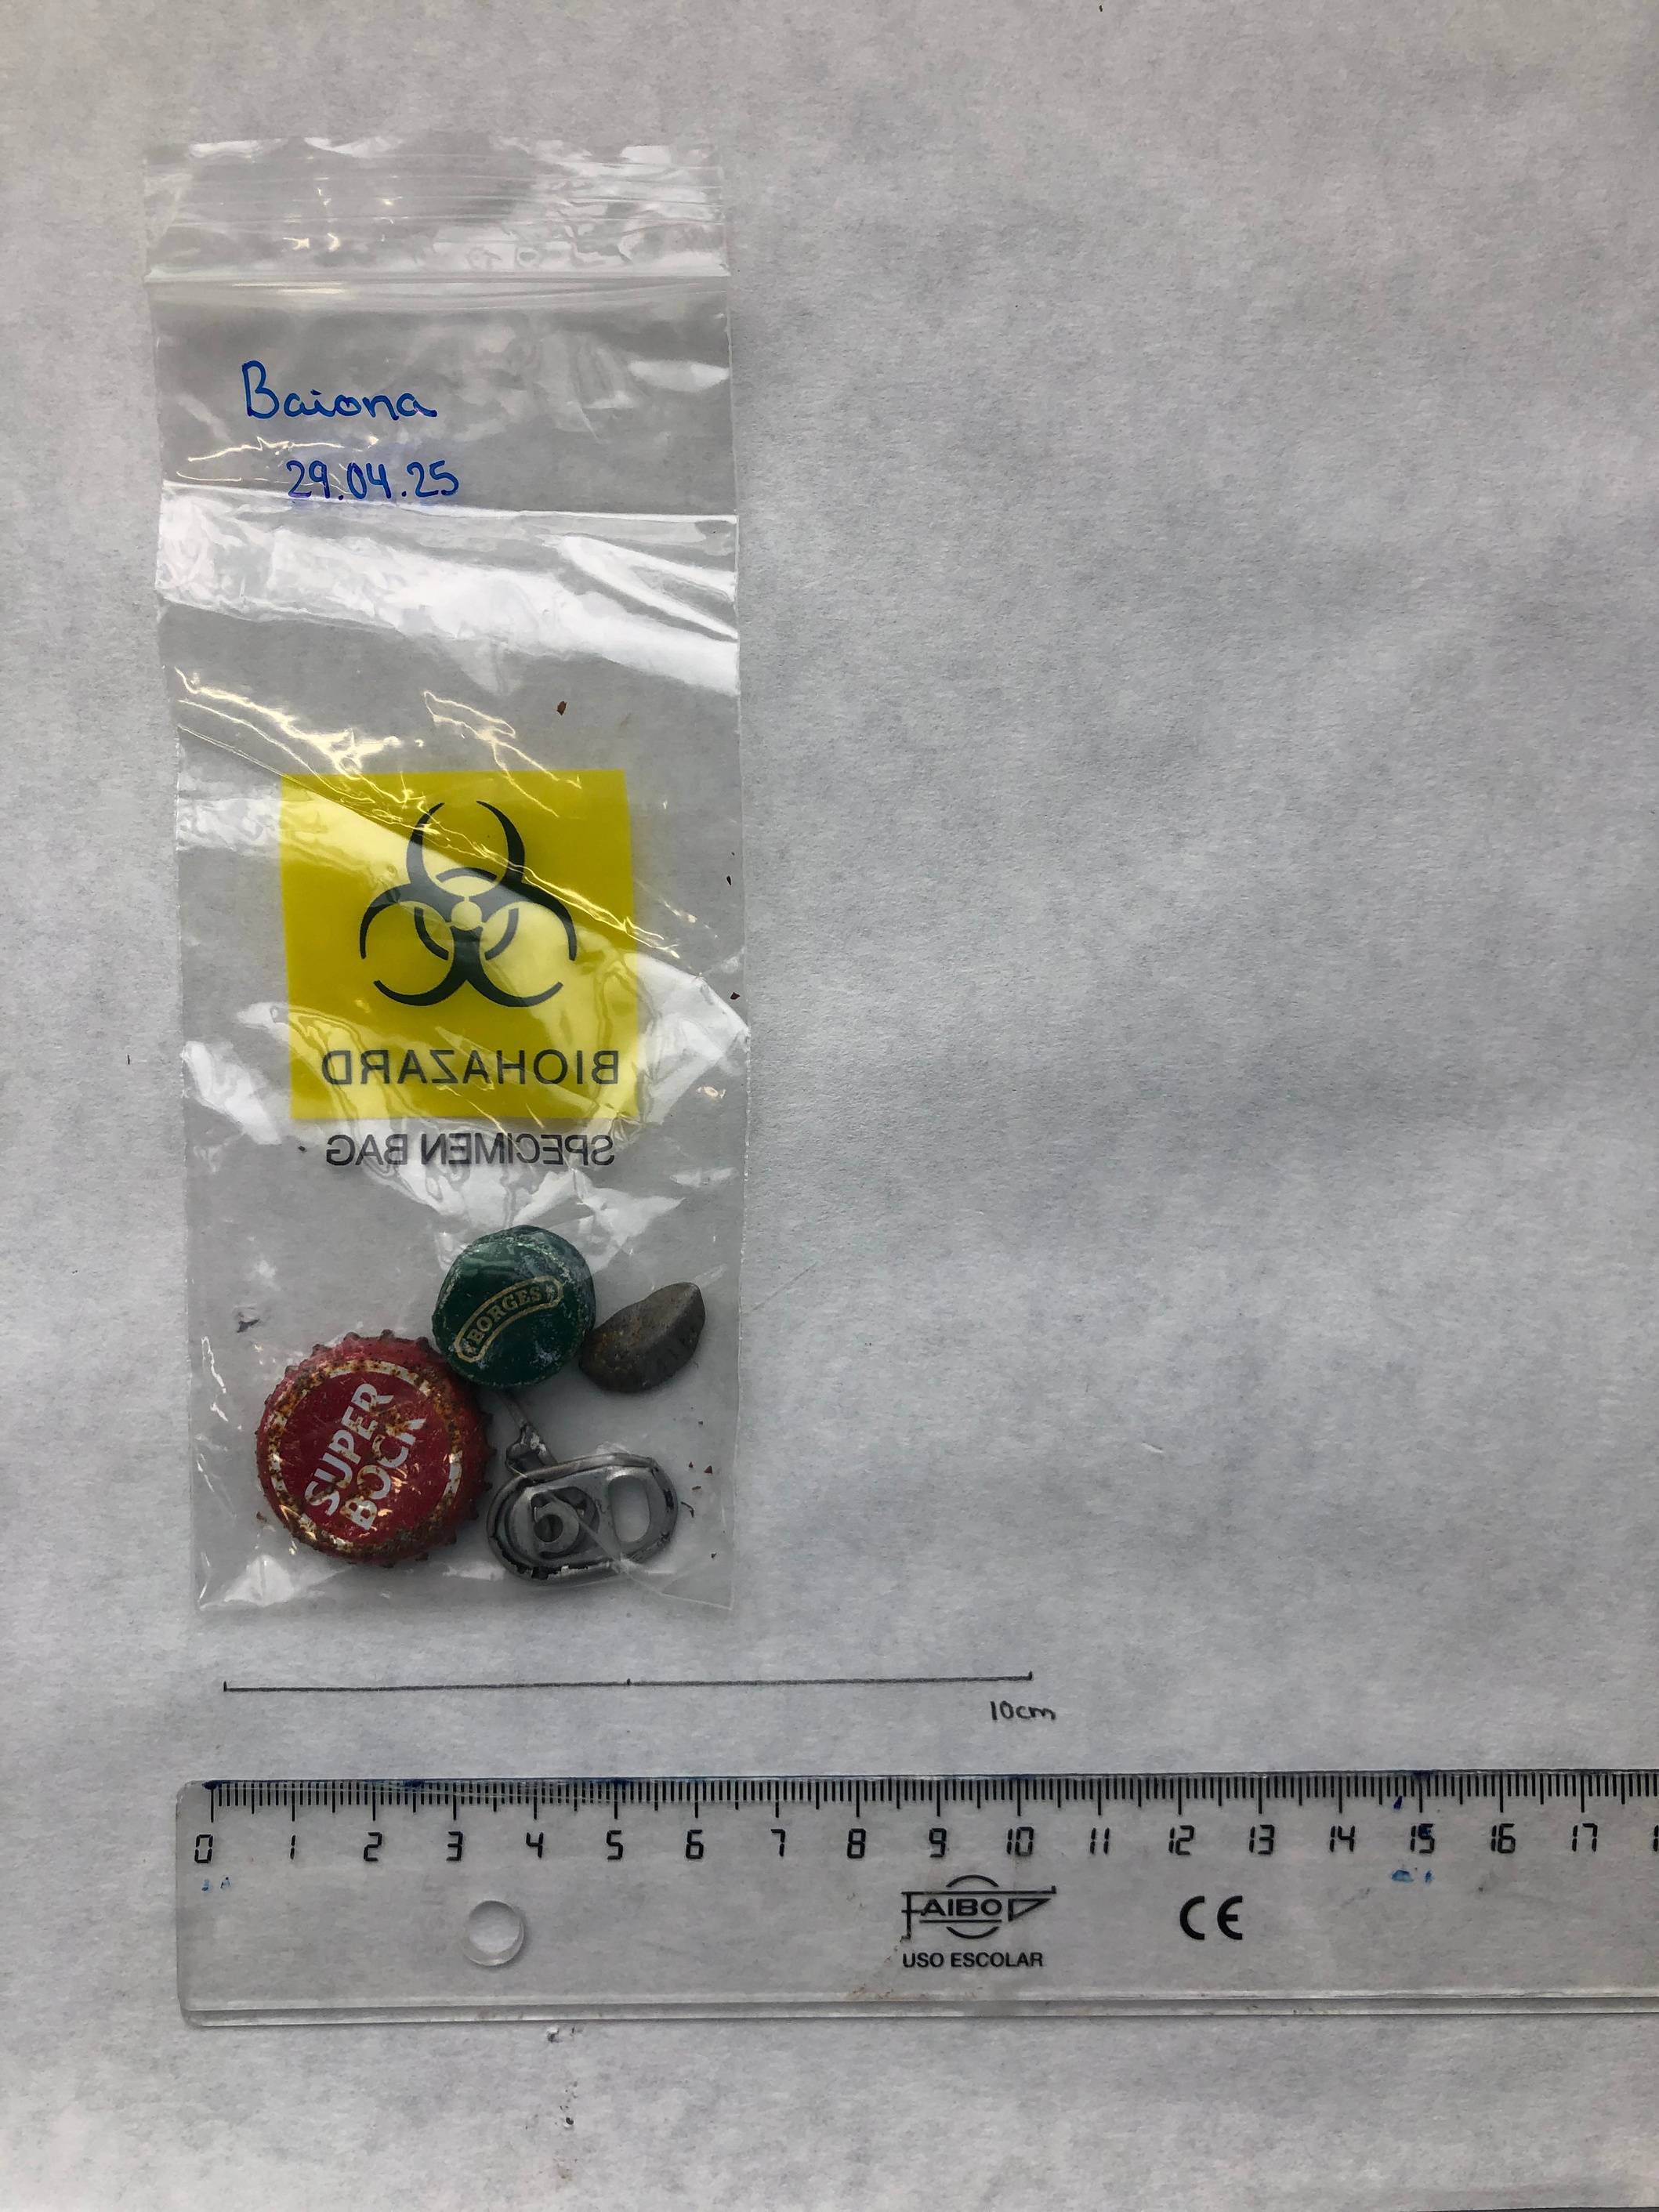

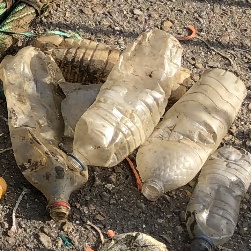

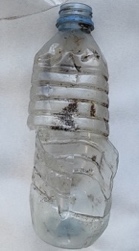


REP-01

153D

136G

Aquaculture – Fisheries

REP-02


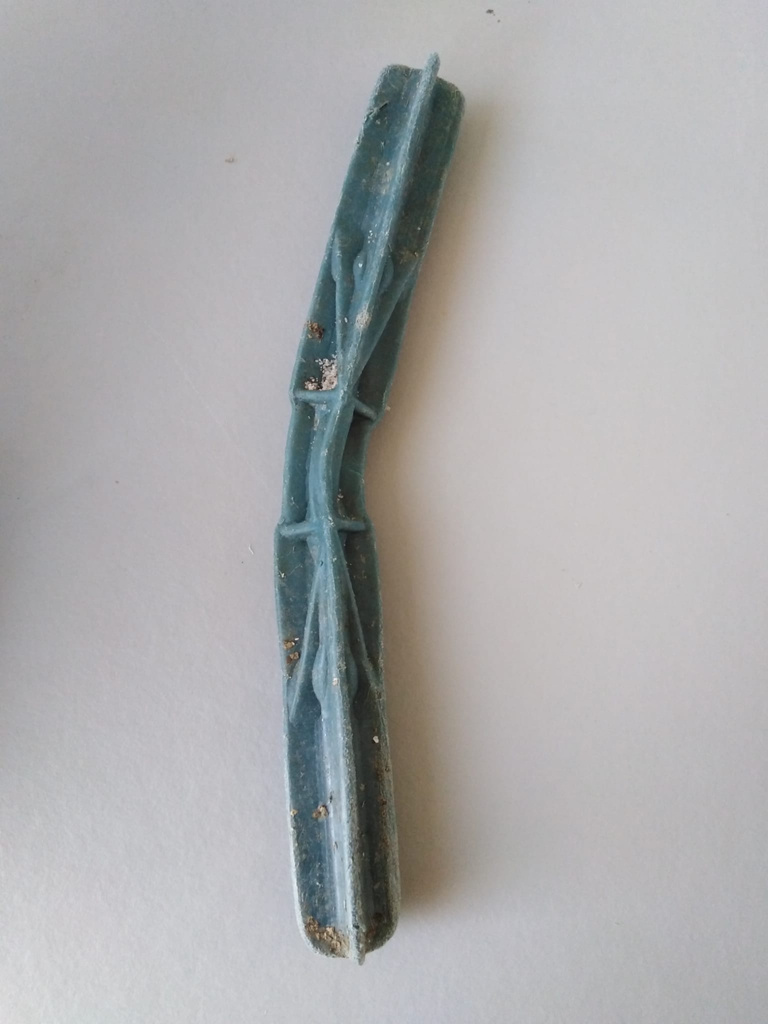

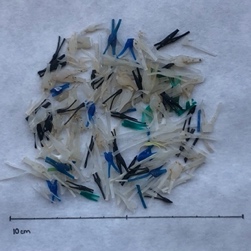
 **
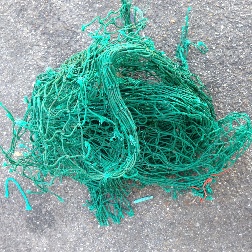

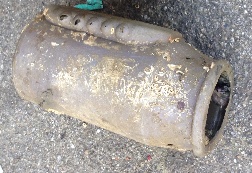
**

REP-03

082

ID091

**Figure B: Unsmoked Cigarette Filters and Unsmoked Biodegradable Filters tested**

**
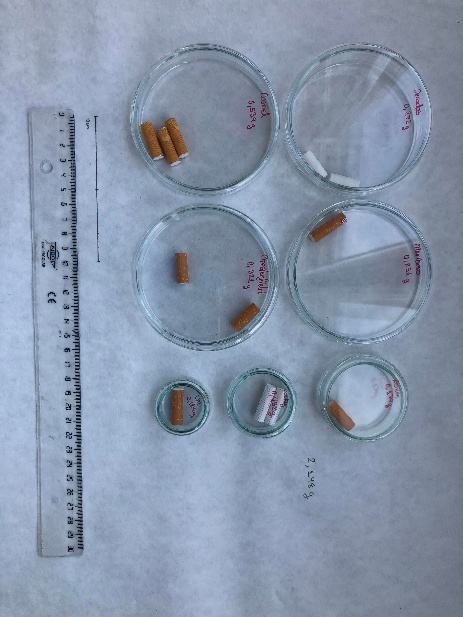

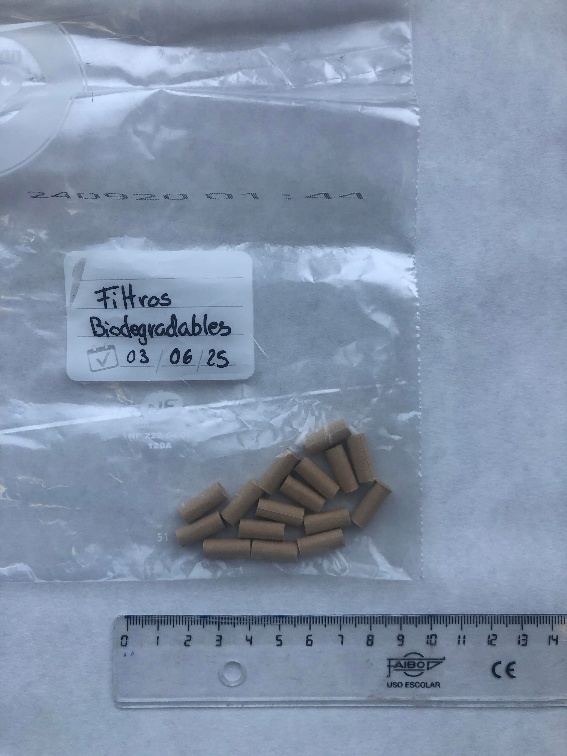
**

**Figure C: Unsmoked Cigarette Filters (UCF) vs Unsmoked Biodegradable Filters (UBF)**


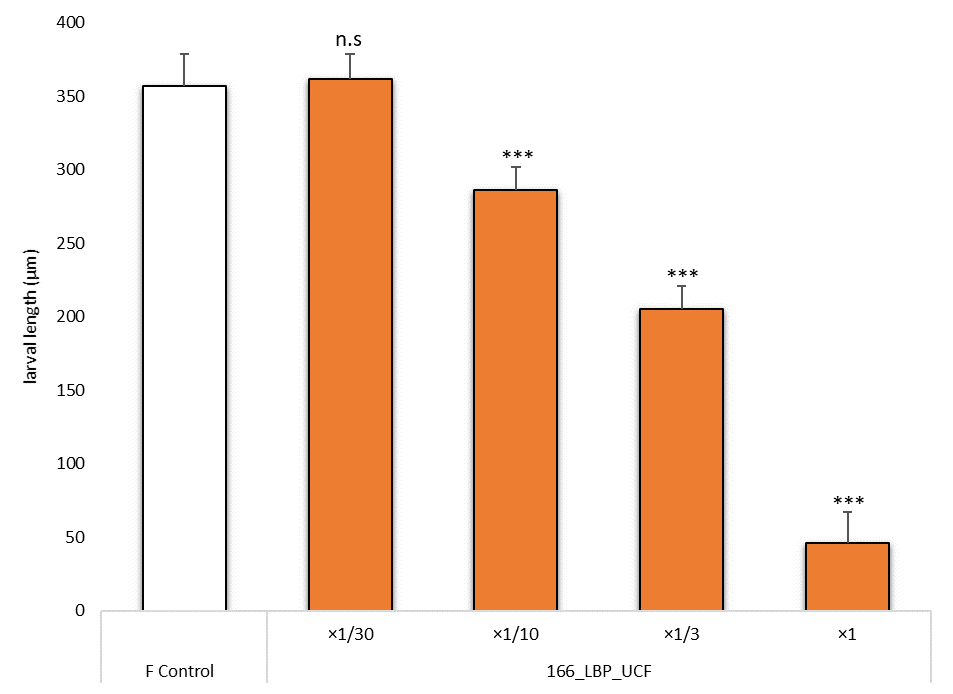

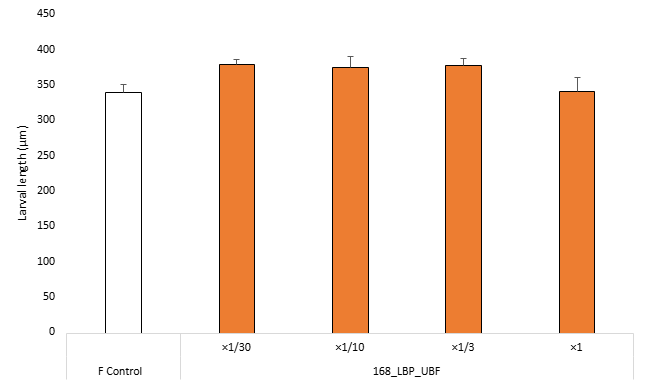


| Item | Dilutions tested | NOEC | LOEC | EC10 (mg/L) | EC50 (mg/L) | TU |
| --- | --- | --- | --- | --- | --- | --- |
| 166 | ×1/30, ×1/10, ×1/3, ×1 | ×1/30 | ×1/10 | 764 | 3257 | 3.07  (2.54 – 3.66) |
| 168 | ×1/30, ×1/10, ×1/3, ×1 | ×1 | n.c | n.c | n.c | < 1  (n.c) |
