# Supplementary material
Source: Research Square preprint supplement (doi:10.21203/rs.3.rs-9498033/v1)

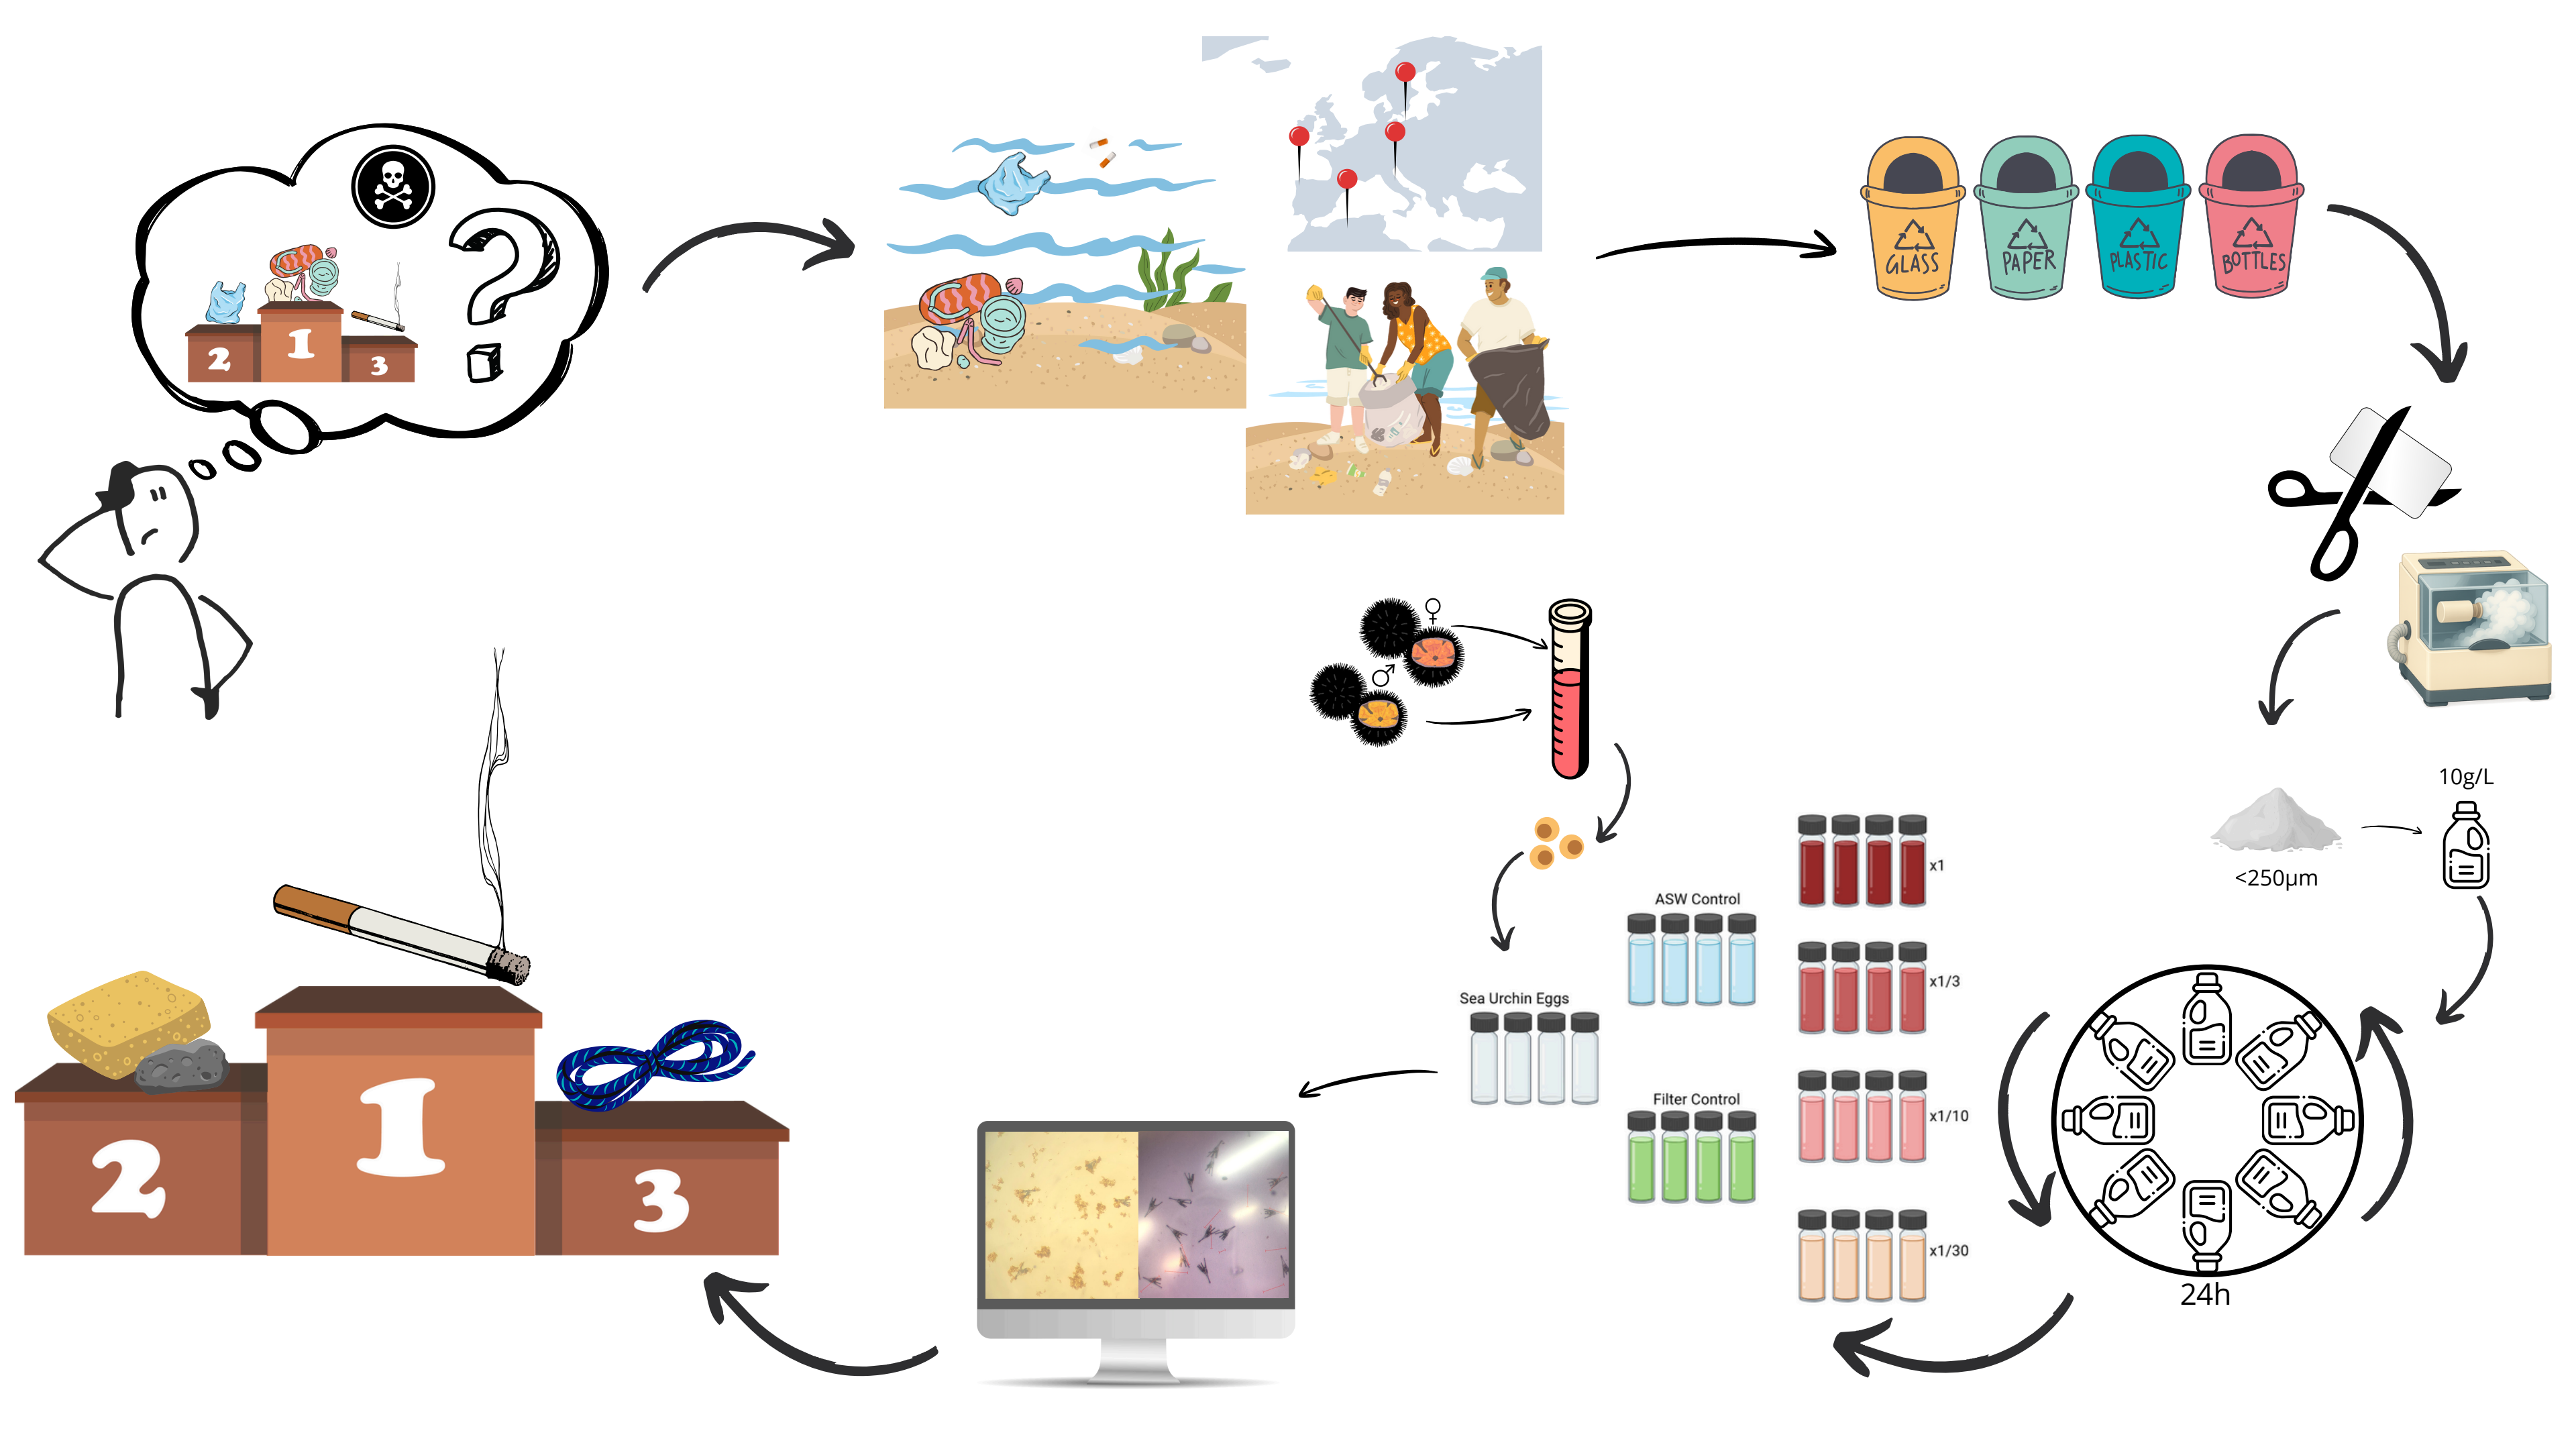

Supplement: Supplementary file 1 [file 0811ccb7fa6af990469ff2fc.pdf]
